# Supplementary material for: Seismic survey in urban area: the activities of the EMERSITO INGV emergency group in Ancona (Italy) following the 2022 M W 5.5 Costa Marchigiana-Pesarese earthquake
Source: Copernicus journal article supplement (doi:10.5194/essd-2024-162), 2024-08-19

| NET-STA  | Owner | Region | District | Municipality | Place |
|----------|-------|--------|----------|--------------|-------|
| 6N-CMA11 | INGV  | Marche | Ancona   | Ancona       | Navy  |

| LatN, LonE           | Digitizer + sensors                       | Start/End working       | Reference Station | Team     |
|----------------------|-------------------------------------------|-------------------------|-------------------|----------|
| 43.598542, 13.506017 | Reftek 130+<br>Lennartz 5s +<br>Episensor | 2022.11.14 - 2023.02.24 | 6N-CMA15          | EMERSITO |

| Position in the net                                                                                                      | Geology                                                                                                                  | Topography and position                                                                                                                                                                                                                                                                                                                                             |
|--------------------------------------------------------------------------------------------------------------------------|--------------------------------------------------------------------------------------------------------------------------|---------------------------------------------------------------------------------------------------------------------------------------------------------------------------------------------------------------------------------------------------------------------------------------------------------------------------------------------------------------------|
| 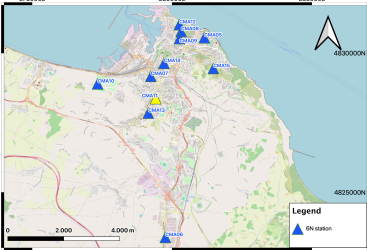                                        |                                         |                                                                                                                                                                                                                                                                                  |
| <p>© OpenStreetMap contributors 2024.<br/>Distributed under the Open Data Commons Open Database License (ODbL) v1.0.</p> | <p>© OpenStreetMap contributors 2024.<br/>Distributed under the Open Data Commons Open Database License (ODbL) v1.0.</p> | <p>Images ©2024 Airbus,Maxar Technologies<br/>Tarquini S., Isola I., Favalli M., Battistini A. (2007). © TINITALY, a digital elevation model of Italy with a 10 meters cell size (Version 1.0) [Data set]. Istituto Nazionale di Geofisica e Vulcanologia (INGV).<br/><a href="https://doi.org/10.13127/tinitaly/1.0">https://doi.org/10.13127/tinitaly/1.0</a></p> |

| f0 - Noise (Hz) | Direction of maximum amplification - Noise (degrees) |
|-----------------|------------------------------------------------------|
| 1.4÷1.5         | 100                                                  |

### HVNSR (noise) and HVSR (earthquakes)

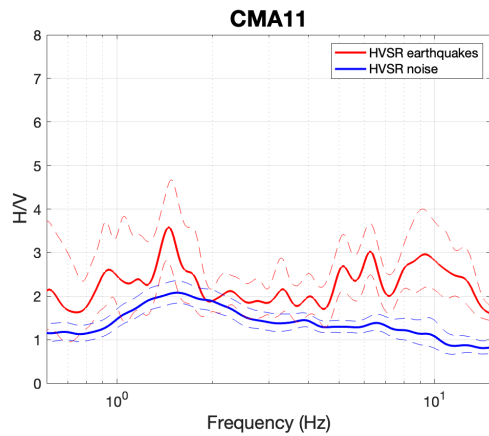

### Rotated HVNSR and polarization analysis

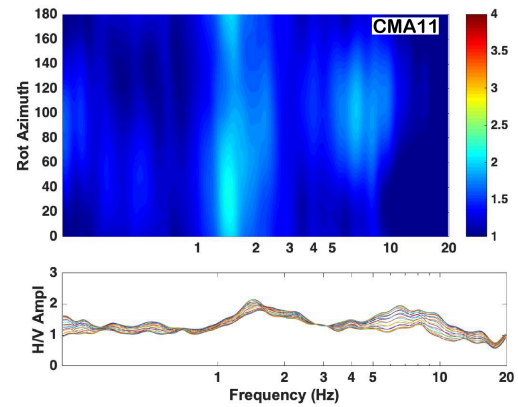

### Continuous HVNSR during the experiment

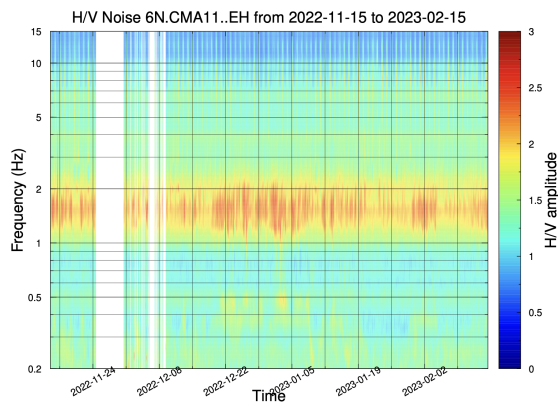

### PSD

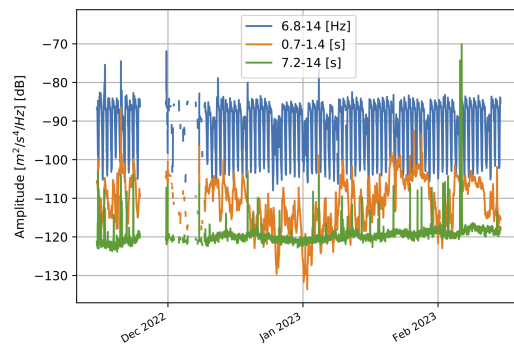

### Rotated HVSR and polarization analysis

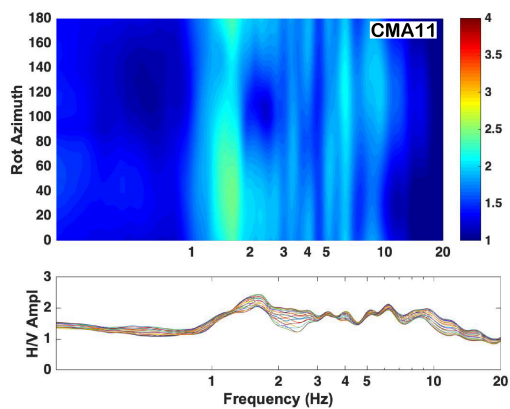

### SSR respect to CMA15 reference site

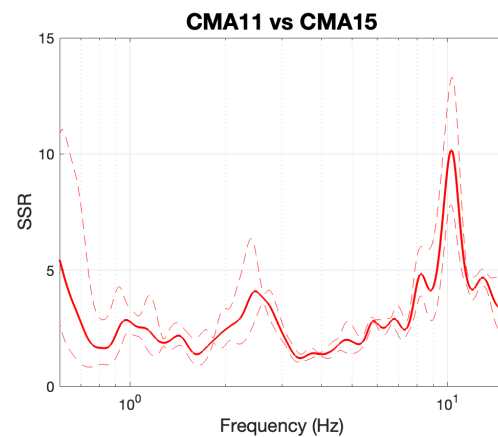

Supplement: Supplementary file 6 [file essd-2024-162-supplement-version2.zip]
