# Supplementary material for: Seismic survey in urban area: the activities of the EMERSITO INGV emergency group in Ancona (Italy) following the 2022 M W 5.5 Costa Marchigiana-Pesarese earthquake
Source: Copernicus journal article supplement (doi:10.5194/essd-2024-162), 2024-08-19

| NET-STA         | Owner       | Region        | District      | Municipality  | Place                |
|-----------------|-------------|---------------|---------------|---------------|----------------------|
| <b>6N-CMA05</b> | <b>INGV</b> | <b>Marche</b> | <b>Ancona</b> | <b>Ancona</b> | <b>Piaget School</b> |

| LatN, LonE                 | Digitizer + sensors                        | Start/End working              | Reference Station | Team            |
|----------------------------|--------------------------------------------|--------------------------------|-------------------|-----------------|
| <b>43.618437, 13.52708</b> | <b>Reftek 130+ Lennartz 5s + Episensor</b> | <b>2022.11.15 - 2023.02.24</b> | <b>6N-CMA15</b>   | <b>EMERSITO</b> |

| Position in the net                                                                                                                                                                                    | Geology                                                                                                                                                                                                | Topography and position                                                                                                                                                                                                                                                                                                                                                                                                                                 |
|--------------------------------------------------------------------------------------------------------------------------------------------------------------------------------------------------------|--------------------------------------------------------------------------------------------------------------------------------------------------------------------------------------------------------|---------------------------------------------------------------------------------------------------------------------------------------------------------------------------------------------------------------------------------------------------------------------------------------------------------------------------------------------------------------------------------------------------------------------------------------------------------|
| 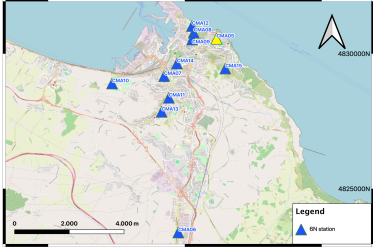 <p>© OpenStreetMap contributors 2024. Distributed under the Open Data Commons Open Database License (ODbL) v1.0.</p> |  <p>© OpenStreetMap contributors 2024. Distributed under the Open Data Commons Open Database License (ODbL) v1.0.</p> |  <p>Images ©2024 Airbus,Maxar Technologies<br/>Tarquini S., Isola I., Favalli M., Battistini A. (2007). © TINITALY, a digital elevation model of Italy with a 10 meters cell size (Version 1.0) [Data set]. Istituto Nazionale di Geofisica e Vulcanologia (INGV).<br/><a href="https://doi.org/10.13127/tinitaly/1.0">https://doi.org/10.13127/tinitaly/1.0</a></p> |

| f0 - Noise (Hz) | Direction of maximum amplification - Noise (degrees) |
|-----------------|------------------------------------------------------|
| 5.2÷5.6         | 30÷36                                                |

## HVNSR (noise) and HVSR (earthquakes)

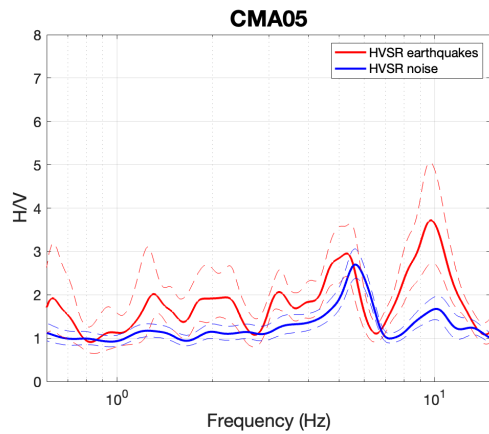

## Rotated HVNSR and polarization analysis

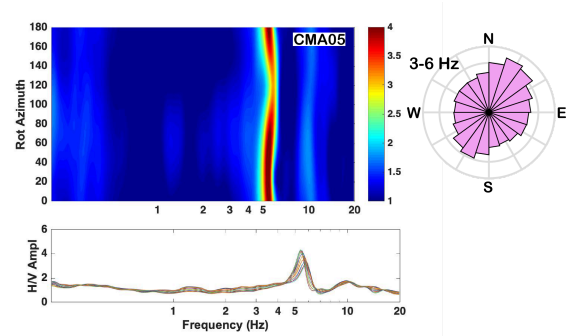

## Continuous HVNSR during the experiment

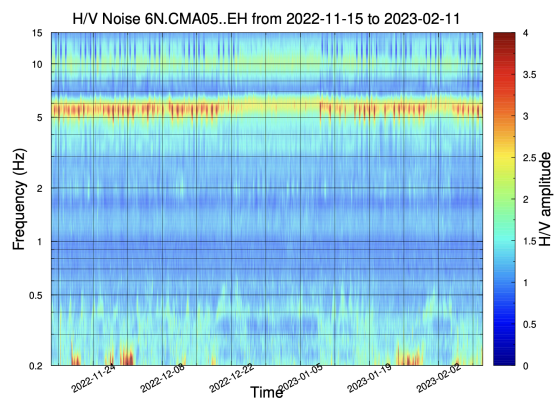

## PSD

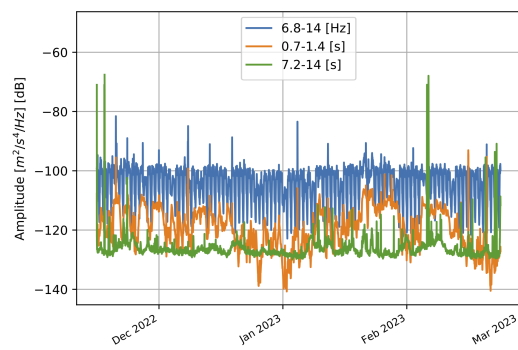

## Rotated HVSR and polarization analysis

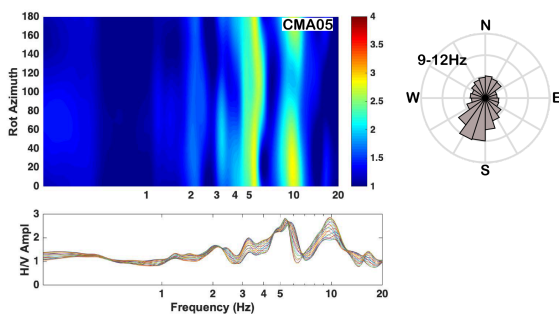

## SSR respect to CMA15 reference site

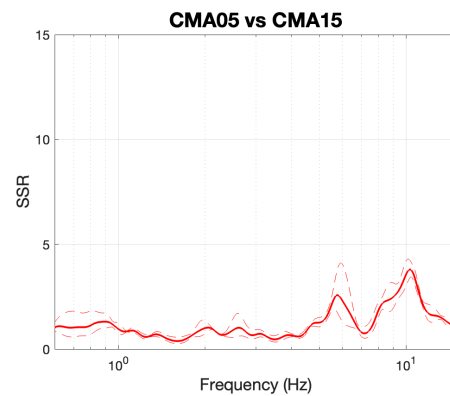

Supplement: Supplementary file 4 [file essd-2024-162-supplement-version2.zip]
